# Supplementary material for: Inhibition of CSPG receptor PTPσ promotes migration of newly born neuroblasts, axonal sprouting, and recovery from stroke
Source: PubMed Central journal article supplement (PMC9677607; doi:10.1016/j.celrep.2022.111137), 2022-07-26
Supplement: NIHMS1829254-supplement-1.pdf [file NIHMS1829254-supplement-1.pdf]

Cell Reports, Volume 40

**Supplemental information**

**Inhibition of CSPG receptor  $PTP\sigma$  promotes  
migration of newly born neuroblasts,  
axonal sprouting, and recovery from stroke**

**Fucheng Luo, Jiapeng Wang, Zhen Zhang, Zhen You, Alicia Bedolla, FearGod Okwubido-Williams, L. Frank Huang, Jerry Silver, and Yu Luo**

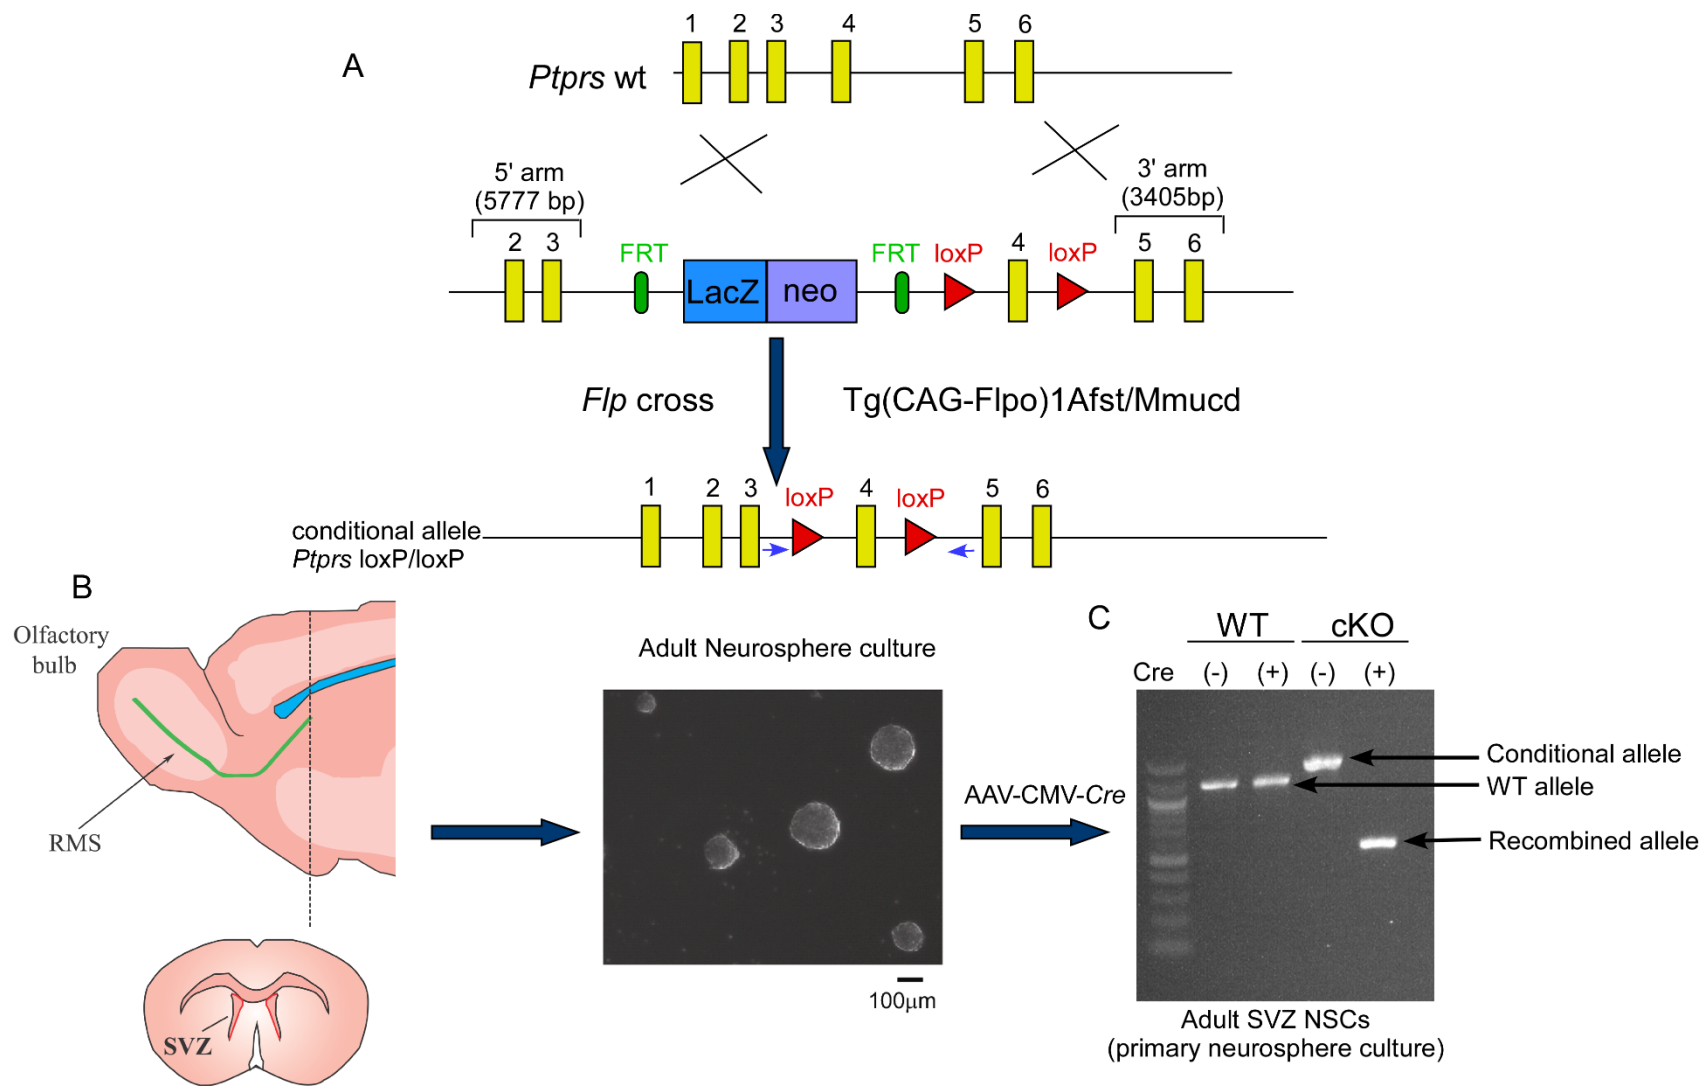

**Fig S1.** Generation of the *Ptprs* loxP/loxP mice (exon 4 is flanked by two loxP sites). Related to Fig 2. (A). Generation of adult NSC neurosphere cultures from the *Ptprs* loxP/loxP mice (B). Deletion of the *Ptprs* gene is achieved by infection of AAV-CMV-cre one passage before the specific assay. Confirmation of deletion of exon 4 by PCR primers flanking the two loxP sites (C).

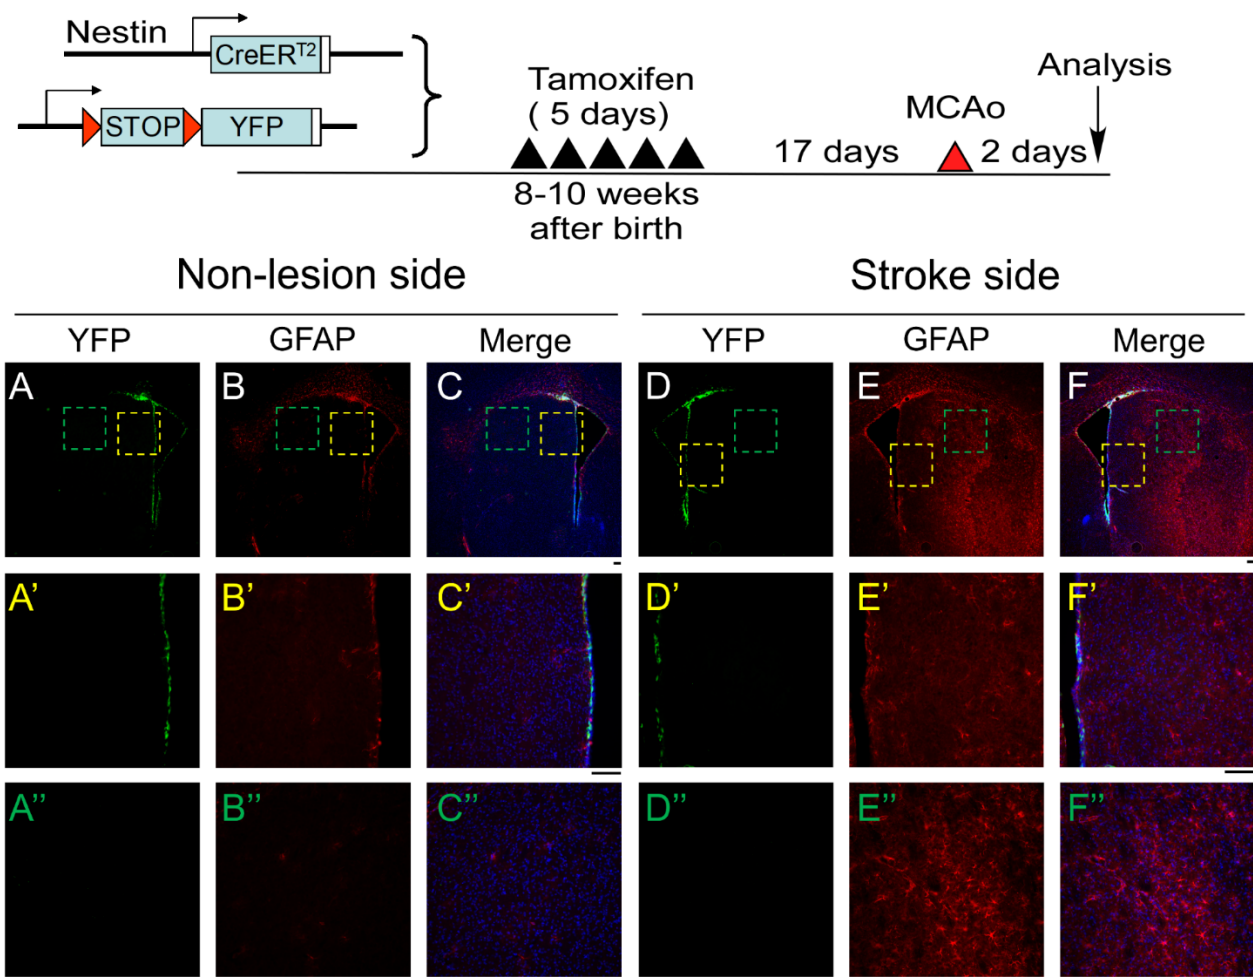

**Fig S2** NestinCreER-Rosa26YFP in mice does not label reactive astrocytes at 2 days post stroke when a regimen of Tamoxifen was given 17 days before stroke. Relate to Fig 3. YFP<sup>+</sup> cells were detected in both the non-lesion side and stroke side SVZ (A' and D') at 2 days after stroke. However, although NESTIN/GFAP are upregulated in reactive astrocytes (F''), there is no YFP expression in GFAP<sup>+</sup> reactive astrocytes in the stroke side striatum or cortex (D''), indicating successful clearing of Tamoxifen from the brain and specific labeling of SVZ NSCs and their progeny in this treatment paradigm. Scale bar =100um. Similar results are observed in n=3 mice.

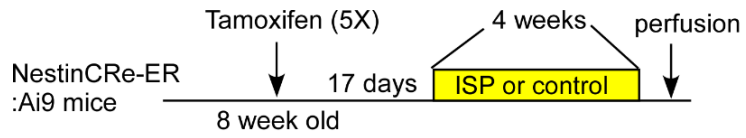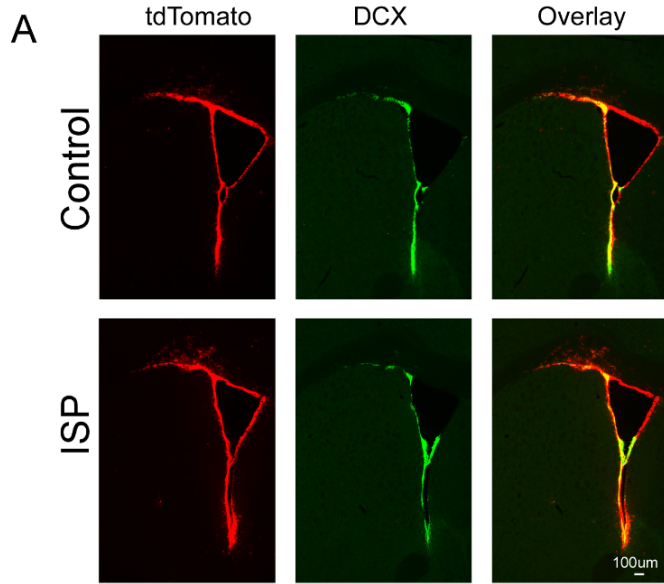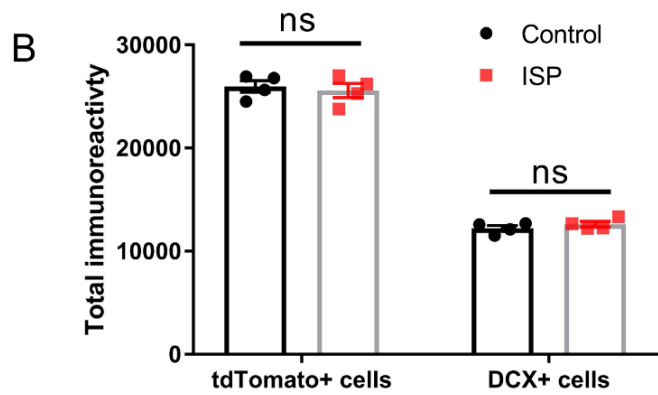

**Fig S3.** 30 day ISP treatment in non-stroke mice show similar tdTomato+ and DCX+ cells at the SVZ. Related to Fig 3. Quantification shown in (B). Mean  $\pm$  SEM. Multiple sections at similar locations were analyzed for each animal and average immunoreactive intensity for each mouse was presented as an individual dot on the plot and analyzed as a single data point for statistical analysis.

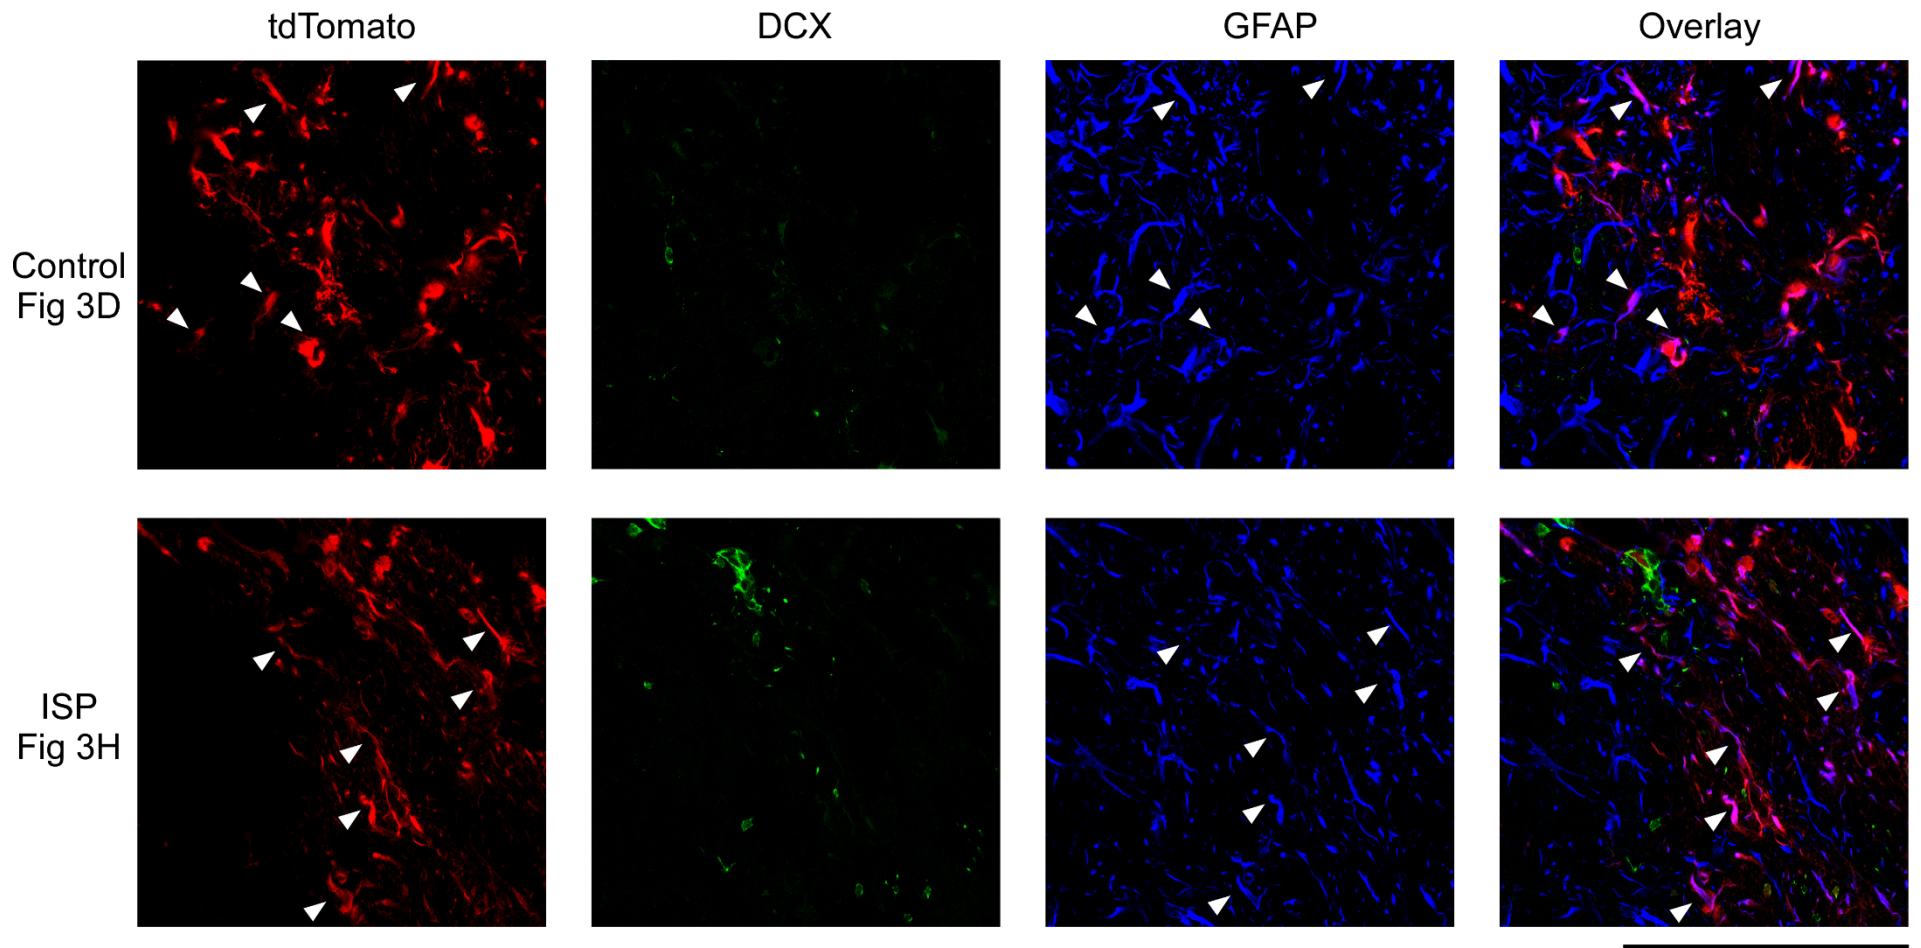

**Fig S4.** Single Channel images for Fig 3 panel D and H showing differentiation of tdTomato+ NSCs into GFAP+ astrocytes. Related to Fig 3. Scale bar=100um.

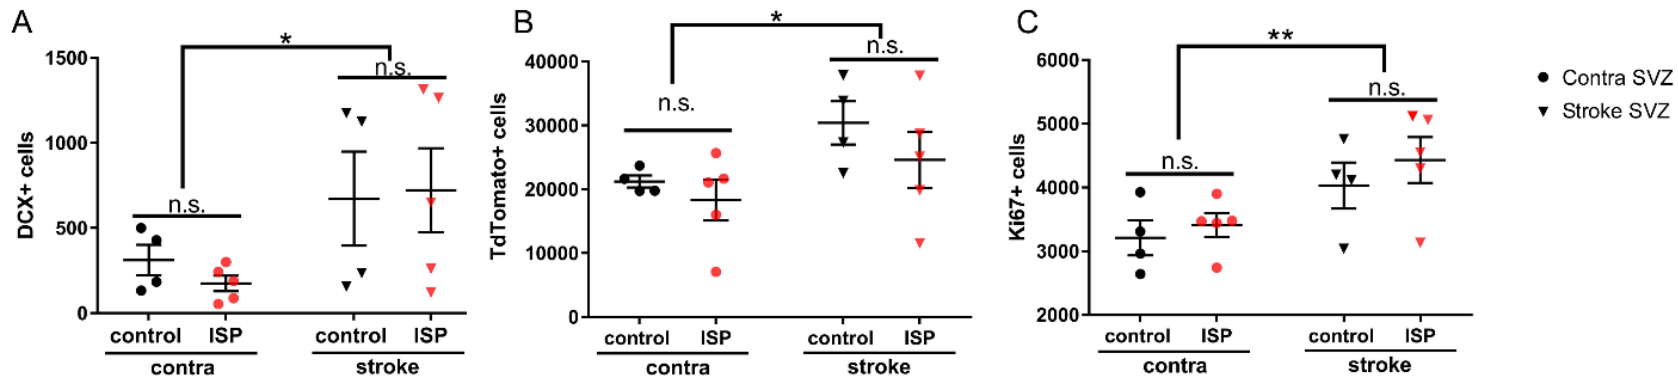

**Fig S5.** ISP treatment starting at psd1 does not change the number of proliferating cells (Ki67+), immature neuroblasts (DCX+) or total newly born cells at 14 days post-stroke within the SVZ (A-C). Related to Fig 3. Mean + SEM. Multiple sections at similar locations were analyzed for each animal and average immunoreactive intensity for each mouse was presented as an individual dot on the plot and analyzed as a single data point for statistical analysis. \* $p < 0.05$ , \*\*  $p < 0.01$ , ns,  $p > 0.05$ .

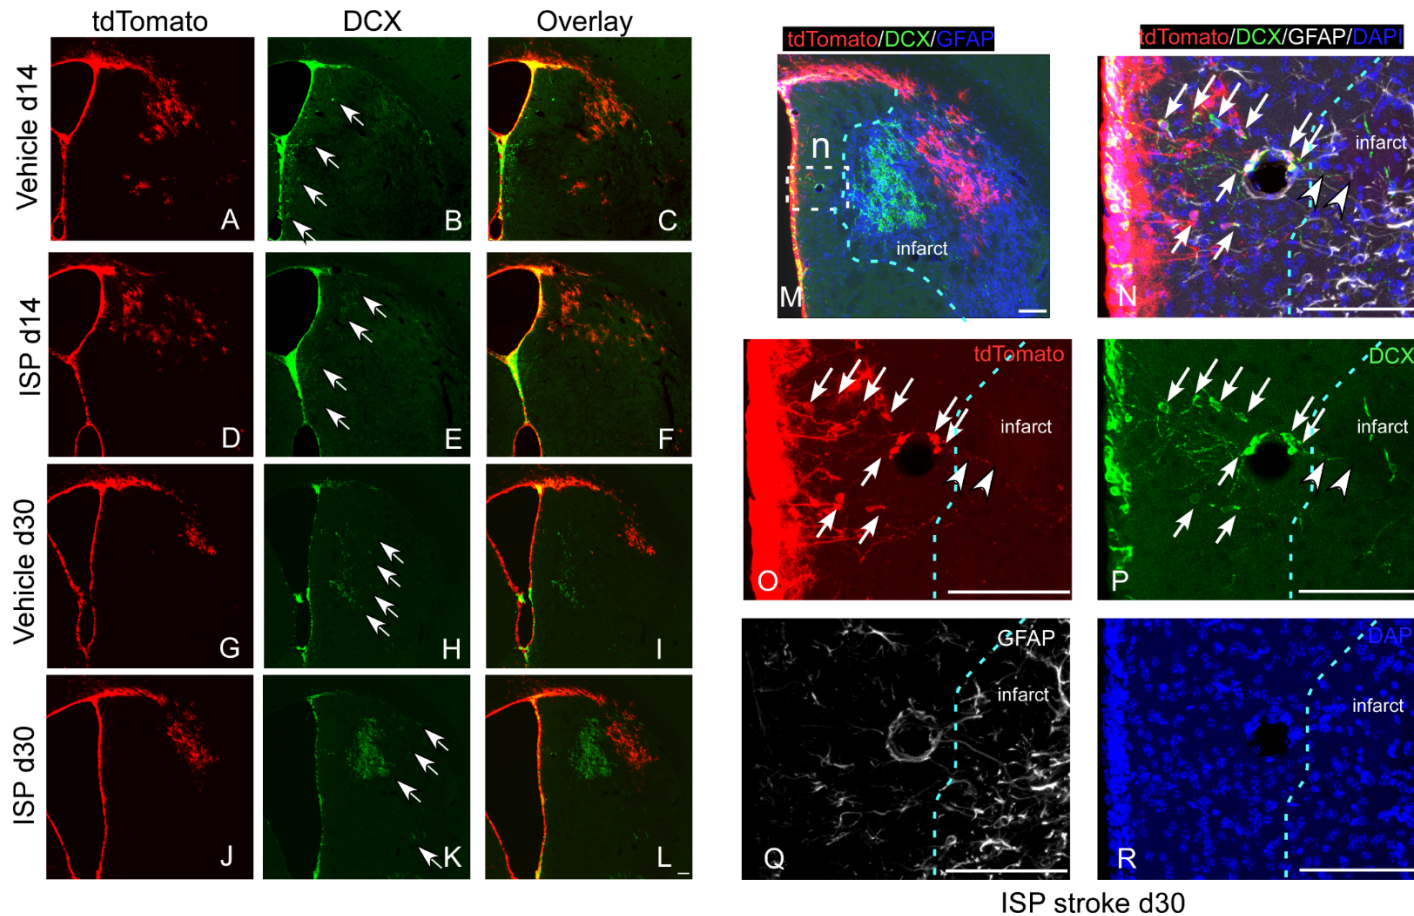

**Fig S6.** Migration of neuroblasts at high magnification. Related to Fig 3. **(A-L)** Migration of SVZ tdTomato positive or DCX+ neuroblasts into the infarct region from d14 to d30 after stroke. White arrows in B, E, H, K indicate the front of DCX+ cells migrating into the infarct zone. **(M-R).** Representative migratory chains of tdTomato+/DCX+ cells from the SVZ towards the infarct zone. Note that tdTomato+/DCX+ are associated with GFAP+ astrocytic endfeet covering blood vessels, a migratory pattern of neuroblasts that has been previously described in stroke brain (Jin et al., 2003; Ohab et al., 2006). Scale bar =100um.

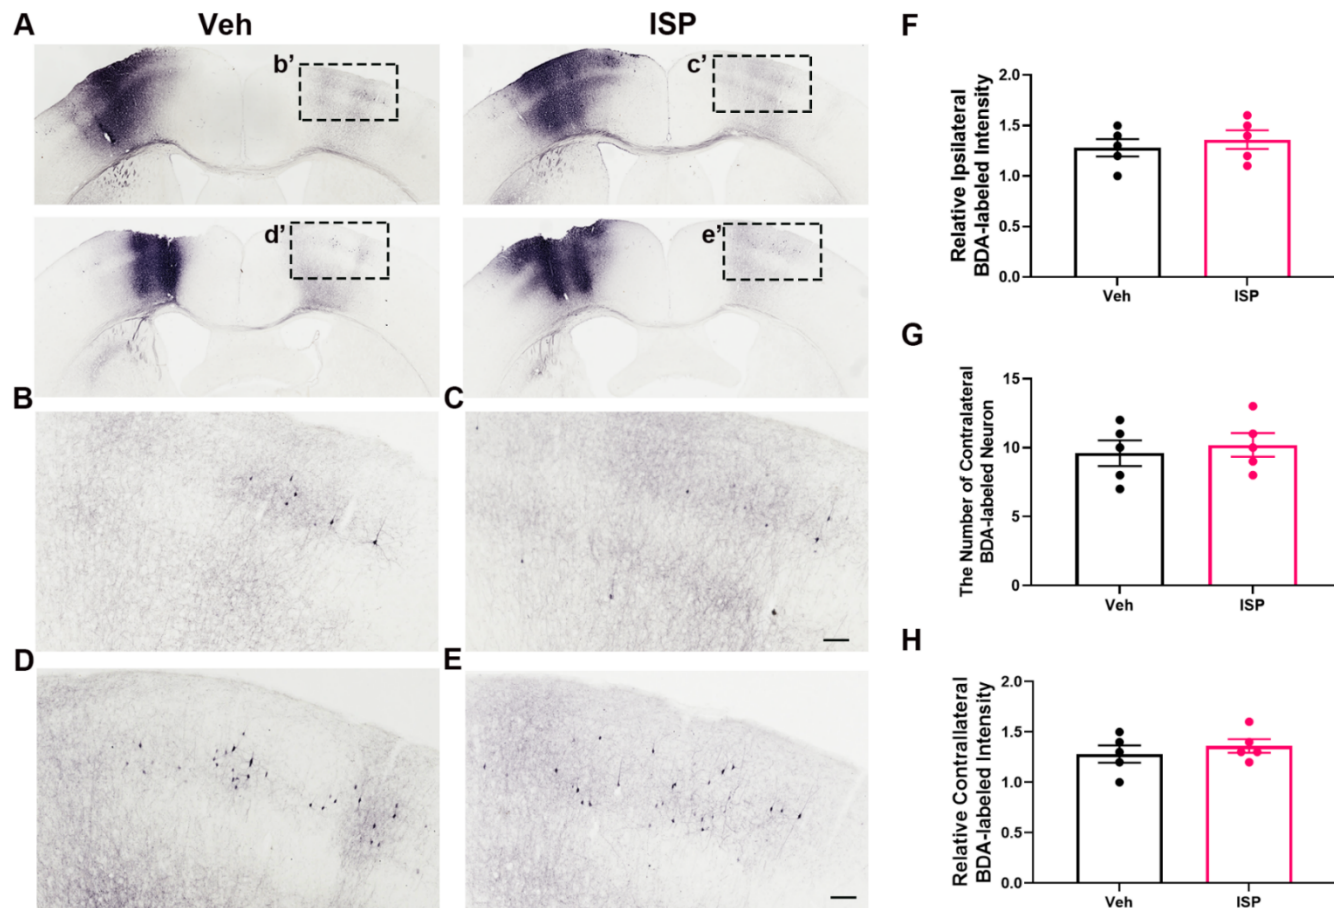

**Fig S7.** ISP treatment in non-stroke mice does not affect BDA uptake and retrograde or anterograde labeling. Related to Fig 4. Injection of BDA in one side of cortex in non-stroke mice labels axons in the contralateral cortex as well as retrogradely labels some neuron cell bodies in the contralateral cortex. Daily ISP treatment for 4 weeks in 3 month old mice (BDA injected at 2weeks after initiation of ISP treatment) does not affect the number of retrogradely labeled neuronal cell bodies or fiber density in the contralateral side (2 representative coronal positions shown for Veh or ISP treated mice.  $p > 0.05$  for all measurements, Student's t-test). Scale bar=100 $\mu$ m.



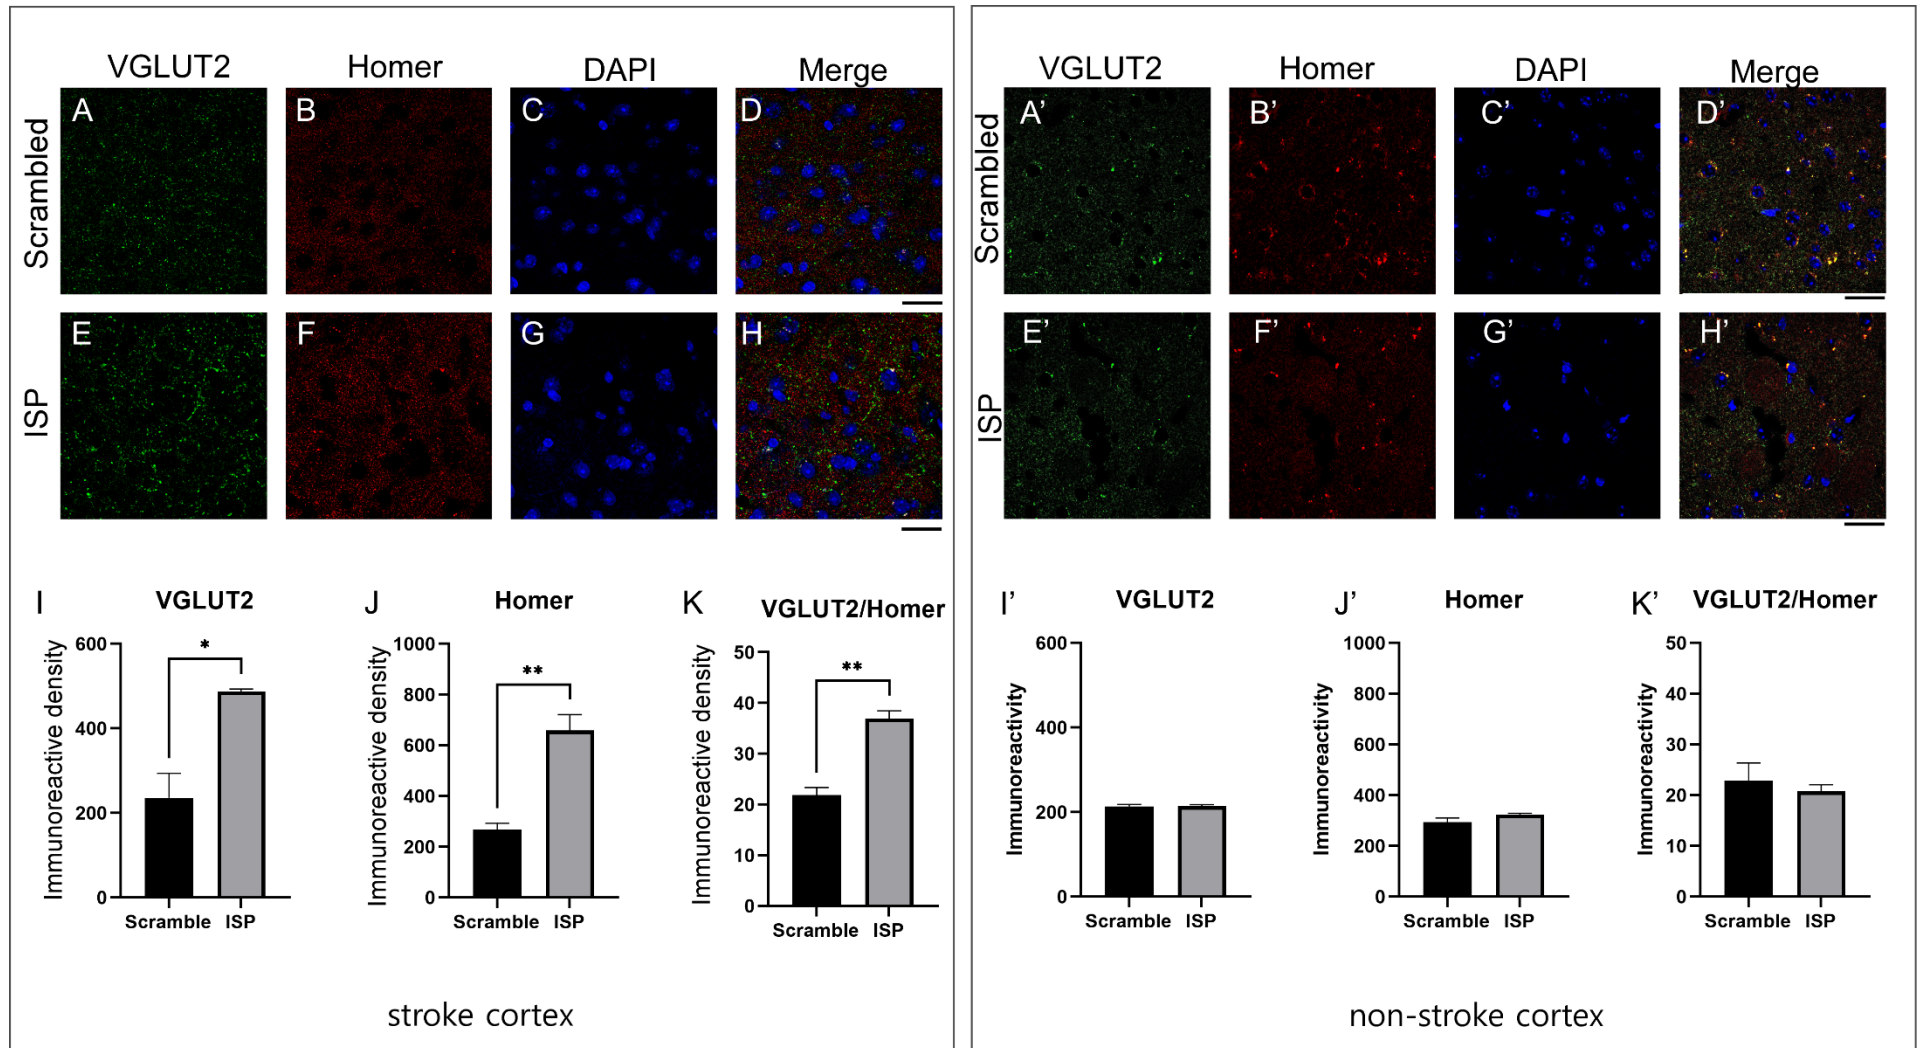

**Fig S8.** Related to Figs 4 and 5. Post-stroke ISP treatment (psd1-psd 30) increases synaptic density at the peri-infarct zone measured by the pre-synaptic marker VGlut2 and post-synaptic marker Homer (A-K). ISP treatment (for 30 days) in non-stroke mice does not affect synaptic density in cortex measured by the pre-synaptic marker VGlut2 and post-synaptic marker Homer (A'-K'). Three images from three sections encompassing the infarct core were quantified from each animal and the average from each mouse was used as a single data point for statistical analysis. Mean  $\pm$  SEM. n= 3 mice for each group. \* $p$ <0.05, \*\* $p$ <0.01, Student's t-test.

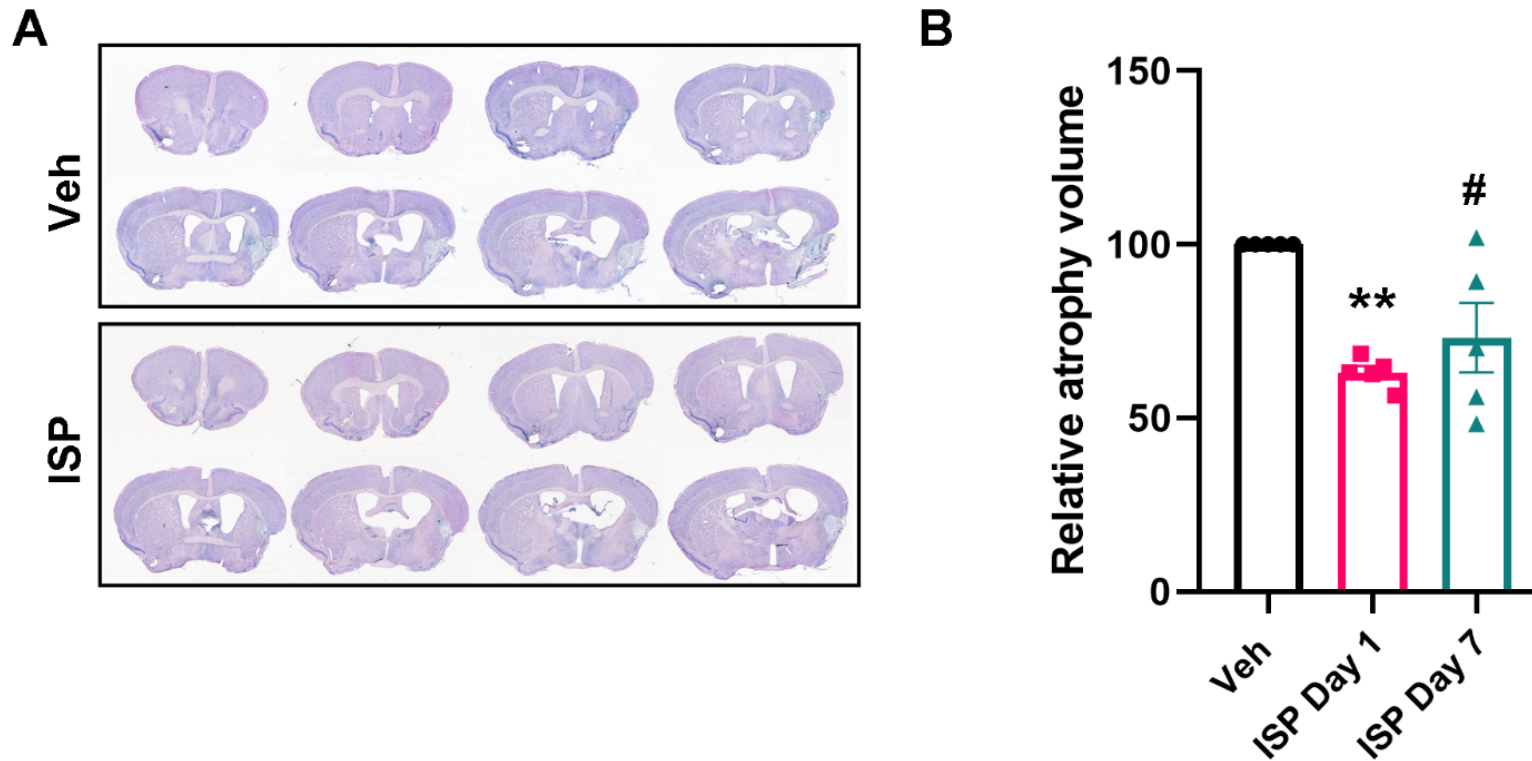

**Fig S9.** ISP treatment decreased brain atrophy after stroke. Related to Figs 4 and 5. ISP treatment started at psd1 resulted in the least atrophy compared to vehicle (Veh) mice. ISP treatment started at psd7 also show reduced atrophy but to a less extent compared to psd1 treatment and shows bigger variations among animals compared to Veh (A,B). \*\*,  $p < 0.01$  and #,  $p < 0.05$ , ANOVA.

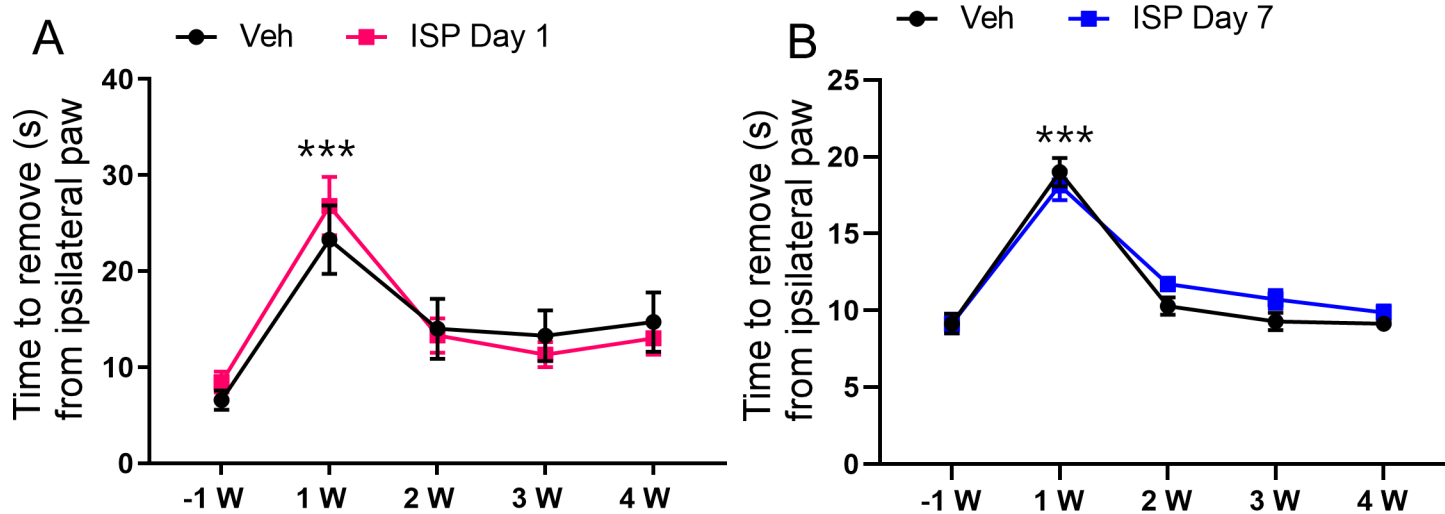

**Fig S10.** For the Adhesive removal test, post-stroke ISP treatment starting at day 1 or day 7 does not affect the time to remove the tape from the unaffected ipsilateral side (left paw in our model). Related to Figs 6 and 7. Note that the time to remove the tape transiently increases for the 1-week post-stroke time point (\*\*\*) compared to pre-stroke baseline ANOVA), but quickly returns to pre-stroke levels at later time points with no differences between Veh and ISP groups. (n=7 for Veh and n=12 for ISP for ISP Day 1 treatment paradigm and n=7 for Veh and n=7 for ISP for ISP Day 7 treatment paradigm).

## Daily ISP treatment in non-stroke naïve mice

### A. Locomotion test

• Veh ■ ISP

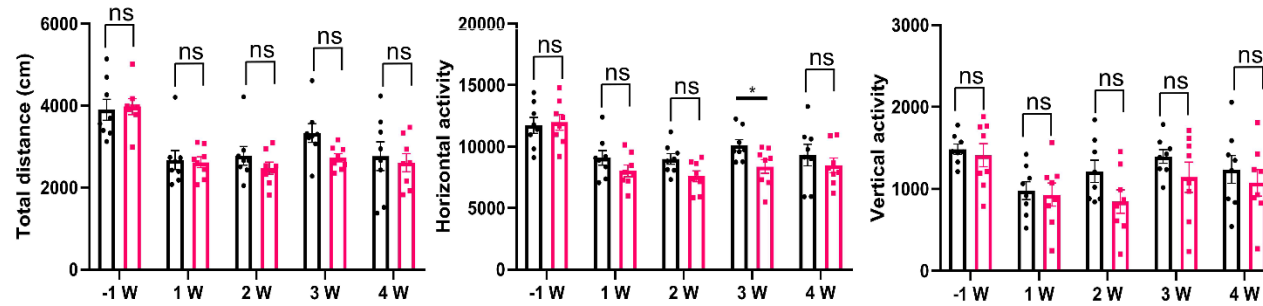

### B. Adhesive removal test

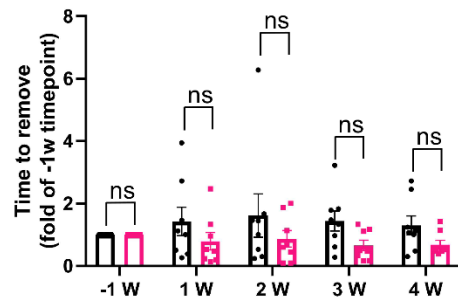

### Barnes Maze test

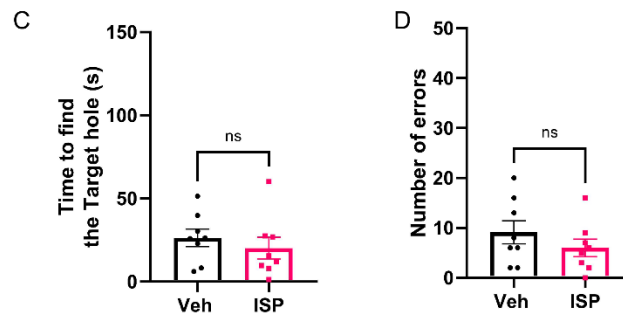

**Fig S11.** The effects of daily ISP treatment on the non-stroke naïve mice at different time points after ISP treatment. Related to Figs 6 and 7. -1w (week) data were baseline data measured before the treatment of Veh or ISP (no baseline data was obtained for the Barnes Maze test to avoid memory from the baseline test). General locomotor performance was measured by automated open field chambers for 1 h (A). Fine motor function was measured by the adhesive tape removal test (B) Cognitive function was measured by Barnes Maze at 4 w after stroke (C-D). \*  $p < 0.05$ , Two-way RM ANOVA for (A-B) and Student's t-test for (C-D). Each data point represents an individual mouse.

**Table S3.** Effect Size and p value from RM Two Way ANOVA for behavioral analysis. Related to Figs 6 and 7.

| <b>ISP day 1</b>           |             |                           |          |             |              |                |                    |
|----------------------------|-------------|---------------------------|----------|-------------|--------------|----------------|--------------------|
| <b>Total distance</b>      | Veh Mean    | ISP Mean                  | Veh SD   | ISP SD      | Cohen's d    | Coefficient, r | P value ISP vs Veh |
| -1 W                       | 2568.57143  | 2656                      | 366.8973 | 450.341688  | 0.212854169  | 0.102138847    | 0.657              |
| 3 d                        | 1196.42857  | 1154.083                  | 380.1477 | 488.320397  | -0.096769325 | -0.046628465   | 0.829              |
| 1 W                        | 1439.28571  | 1666.417                  | 383.2887 | 486.072471  | 0.518909691  | 0.242818449    | 0.25               |
| 2 W                        | 1793.42857  | 2317.083                  | 340.6713 | 448.911706  | 1.314118081  | 0.535393349    | 0.009              |
| 3 W                        | 1916.28571  | 2553.167                  | 266.8418 | 366.076205  | 1.988232959  | 0.692184948    | 0.002              |
| 4 W                        | 2136.14286  | 2677.417                  | 229.2949 | 443.651677  | 1.532784907  | 0.594520436    | 0.007              |
| <b>Horizontal activity</b> |             |                           |          |             |              |                |                    |
| -1 W                       | 9208.85714  | 10238                     | 938.6168 | 1616.01119  | 0.778794452  | 0.351674943    | 0.119              |
| 3 d                        | 5141.71429  | 5181.417                  | 1607.212 | 1100.29545  | 0.028826733  | 0.013903991    | 0.952              |
| 1 W                        | 7081.28571  | 7030.583                  | 1870.861 | 1365.6217   | -0.030956849 | -0.014931189   | 0.938              |
| 2 W                        | 7771.71429  | 8878                      | 961.2668 | 1520.2019   | 0.86984517   | 0.386913257    | 0.094              |
| 3 W                        | 8212.71429  | 10024.75                  | 977.5199 | 1339.79463  | 1.545142131  | 0.597606104    | 0.007              |
| 4 W                        | 9091.71429  | 10957.08                  | 932.3379 | 1545.03165  | 1.461882421  | 0.576298702    | 0.006              |
| <b>Vertical activity</b>   |             |                           |          |             |              |                |                    |
| -1 W                       | 1082.71429  | 1244.333                  | 246.0696 | 229.753359  | 0.678925285  | 0.311232021    | 0.133              |
| 3 d                        | 296.285714  | 278.0833                  | 261.8834 | 243.544082  | -0.071980301 | -0.034700686   | 0.865              |
| 1 W                        | 525.142857  | 753.3333                  | 183.4189 | 206.257268  | 1.169173859  | 0.491241431    | 0.035              |
| 2 W                        | 772.571429  | 988.9167                  | 190.2734 | 225.805813  | 1.036152017  | 0.447081398    | 0.046              |
| 3 W                        | 789.857143  | 1054.583                  | 124.6026 | 208.274058  | 1.542552341  | 0.596961605    | 0.015              |
| 4 W                        | 904.285714  | 1211.75                   | 146.5853 | 297.312852  | 1.311734861  | 0.534700168    | 0.005              |
| <b>Adhesive removal</b>    |             |                           |          |             |              |                |                    |
| -1 W                       | 12.2857143  | 9.166667                  | 5.82278  | 6.19139187  | -0.51898387  | -0.242851113   | 0.682              |
| 1 W                        | 113.428571  | 99.333333                 | 12.13613 | 18.5978168  | -0.897617911 | -0.397341921   | 0.067              |
| 2 W                        | 94.5714286  | 72.5                      | 11.74531 | 25.6957726  | -1.104797669 | -0.470309933   | 0.005              |
| 3 W                        | 84.8571429  | 52.25                     | 9.370674 | 23.2540319  | -1.839308333 | -0.663674096   | <0.001             |
| 4 W                        | 63.1428571  | 36.333333                 | 7.515064 | 11.0068849  | -2.844780385 | -0.808176426   | <0.001             |
| <b>Barnes maze</b>         |             |                           |          |             |              |                |                    |
| latency                    | 92.7142857  | 62.16667                  | 14.69086 | 19.6090579  | -1.763173137 | -0.647875297   | 0.002393638        |
| error trials               | 10.7857143  | 4.291667                  | 2.233404 | 2.61515108  | -2.670491141 | -0.789922215   | 3.983E-05          |
| <b>For Cohen's d</b>       |             | <b>For Coefficient, r</b> |          |             |              |                |                    |
| Relative size              | Effect size | Strength of Association   |          | Effect size |              |                |                    |
| small                      | 0.2-0.5     | small                     |          | 0.-0.3      |              |                |                    |
| medium                     | 0.5-0.8     | medium                    |          | 0.3-0.5     |              |                |                    |
| large                      | >0.8        | large                     |          | >0.5-1      |              |                |                    |

**ISP day 7**

| <b>Total distance</b>      | Veh Mean   | ISP Mean | Veh SD   | ISP SD     | Cohen's d           | Coefficient, r      | P value ISP vs Veh |
|----------------------------|------------|----------|----------|------------|---------------------|---------------------|--------------------|
| -1 W                       | 3545.14286 | 3405.143 | 528.5604 | 701.065719 | -0.225503176        | -0.112041649        | 0.626              |
| 1 W                        | 1600.71429 | 1864     | 750.5435 | 653.337075 | 0.374186856         | 0.183902456         | 0.36               |
| 2 W                        | 1855.42857 | 2551.714 | 531.426  | 585.112443 | <b>1.245782806</b>  | <b>0.528711296</b>  | 0.018              |
| 3 W                        | 1903.14286 | 2593.286 | 422.0527 | 373.040978 | <b>1.732715016</b>  | <b>0.654797091</b>  | 0.019              |
| 4 W                        | 2280.28571 | 3057     | 144.606  | 349.147533 | <b>2.906628473</b>  | <b>0.823817858</b>  | 0.009              |
| <b>Horizontal activity</b> |            |          |          |            |                     |                     |                    |
| -1 W                       | 11227.1429 | 11671.29 | 2325.659 | 2024.42739 | 0.203711749         | 0.101331592         | 0.696              |
| 1 W                        | 6708.71429 | 7269.143 | 1831.069 | 3041.24357 | 0.223262596         | 0.110942183         | 0.622              |
| 2 W                        | 8343.14286 | 10025.57 | 2385.363 | 1824.65658 | 0.792254182         | 0.368284554         | 0.144              |
| 3 W                        | 8268.42857 | 10452.86 | 2280.207 | 1889.35725 | 1.043223702         | 0.462477301         | 0.06               |
| 4 W                        | 7641       | 11435.29 | 1612.843 | 1408.82726 | <b>2.505678647</b>  | <b>0.781559554</b>  | 0.002              |
| <b>Vertical activity</b>   |            |          |          |            |                     |                     |                    |
| -1 W                       | 1319.42857 | 1548.429 | 325.3587 | 372.445458 | 0.654855413         | 0.311172093         | 0.205              |
| 1 W                        | 401.857143 | 588.5714 | 304.0041 | 343.89381  | 0.575280189         | 0.276431779         | 0.298              |
| 2 W                        | 598.714286 | 853.1429 | 394.8256 | 256.851727 | 0.763908472         | 0.35681249          | 0.16               |
| 3 W                        | 624.571429 | 918.4286 | 368.0688 | 314.748501 | 0.858107391         | 0.39429369          | 0.108              |
| 4 W                        | 593.857143 | 1091     | 305.3503 | 263.823173 | <b>1.74226289</b>   | <b>0.656850932</b>  | 0.01               |
| <b>Adhesive removal</b>    |            |          |          |            |                     |                     |                    |
| -1 W                       | 8          | 9.142857 | 2.081666 | 4.29839394 | 0.338414401         | 0.166835712         | 0.914              |
| 1 W                        | 108.142857 | 112.5714 | 25.37997 | 19.6541526 | 0.195105587         | 0.097091898         | 0.674              |
| 2 W                        | 98.1428571 | 78.71429 | 23.56147 | 26.2406446 | -0.779104217        | -0.362983003        | 0.072              |
| 3 W                        | 79.5714286 | 55       | 26.77597 | 21.023796  | <b>-1.020734065</b> | <b>-0.454585501</b> | 0.025              |
| 4 W                        | 49.8571429 | 21.85714 | 18.24307 | 5.89995964 | <b>-2.065256636</b> | <b>-0.71836491</b>  | 0.011              |
| <b>Barnes maze</b>         |            |          |          |            |                     |                     |                    |
| latency                    | 138.571429 | 54.92857 | 70.30969 | 29.8725467 | <b>-1.548434575</b> | <b>-0.612184929</b> | 0.013404364        |
| error trials               | 24         | 7.857143 | 13.87143 | 4.32737686 | <b>-1.571112212</b> | <b>-0.61774464</b>  | 0.012388494        |

Note: Red letters indicate that the effect size that also have statistical significance ( $p < 0.05$  by post-hoc analysis between veh and ISP in each time point).

Table S4. Time point comparison to baseline level within Veh or ISP group. Related to Figs 6 and 7.

|                            | <b>Veh group</b><br>each time point vs baseline * | <b>ISP group</b><br>each time point vs baseline * |
|----------------------------|---------------------------------------------------|---------------------------------------------------|
| <b>Total distance</b>      |                                                   |                                                   |
| -1 W                       | N/A                                               | N/A                                               |
| 3 d                        | <0.001                                            | <0.001                                            |
| 1 W                        | <0.001                                            | <0.001                                            |
| 2 W                        | 0.001                                             | >0.05                                             |
| 3 W                        | 0.013                                             | >0.05                                             |
| 4 W                        | >0.05                                             | >0.05                                             |
| <b>Horizontal activity</b> |                                                   |                                                   |
| -1 W                       | N/A                                               | N/A                                               |
| 3 d                        | <0.001                                            | <0.001                                            |
| 1 W                        | 0.015                                             | <0.001                                            |
| 2 W                        | >0.05                                             | >0.05                                             |
| 3 W                        | >0.05                                             | >0.05                                             |
| 4 W                        | >0.05                                             | >0.05                                             |
| <b>Vertical activity</b>   |                                                   |                                                   |
| -1 W                       | N/A                                               | N/A                                               |
| 3 d                        | <0.001                                            | <0.001                                            |
| 1 W                        | <0.001                                            | <0.001                                            |
| 2 W                        | 0.064                                             | 0.032                                             |
| 3 W                        | >0.05                                             | >0.05                                             |
| 4 W                        | >0.05                                             | >0.05                                             |
| <b>Adhesive removal</b>    |                                                   |                                                   |
| -1 W                       | N/A                                               | N/A                                               |
| 1 W                        | <0.001                                            | <0.001                                            |
| 2 W                        | <0.001                                            | <0.001                                            |
| 3 W                        | <0.001                                            | <0.001                                            |
| 4 W                        | <0.001                                            | <0.001                                            |

\* post-hoc P value for RM ANOVA
